# Supplementary material
Source: Springer Nature journal article supplement (https://www.springermedizin.de/resource/supplementary/12875_2013_1013_MOESM6_ESM.pdf/9435934)

**Figure 1. Detection of depression stratified by PHQ-9 sererity level**

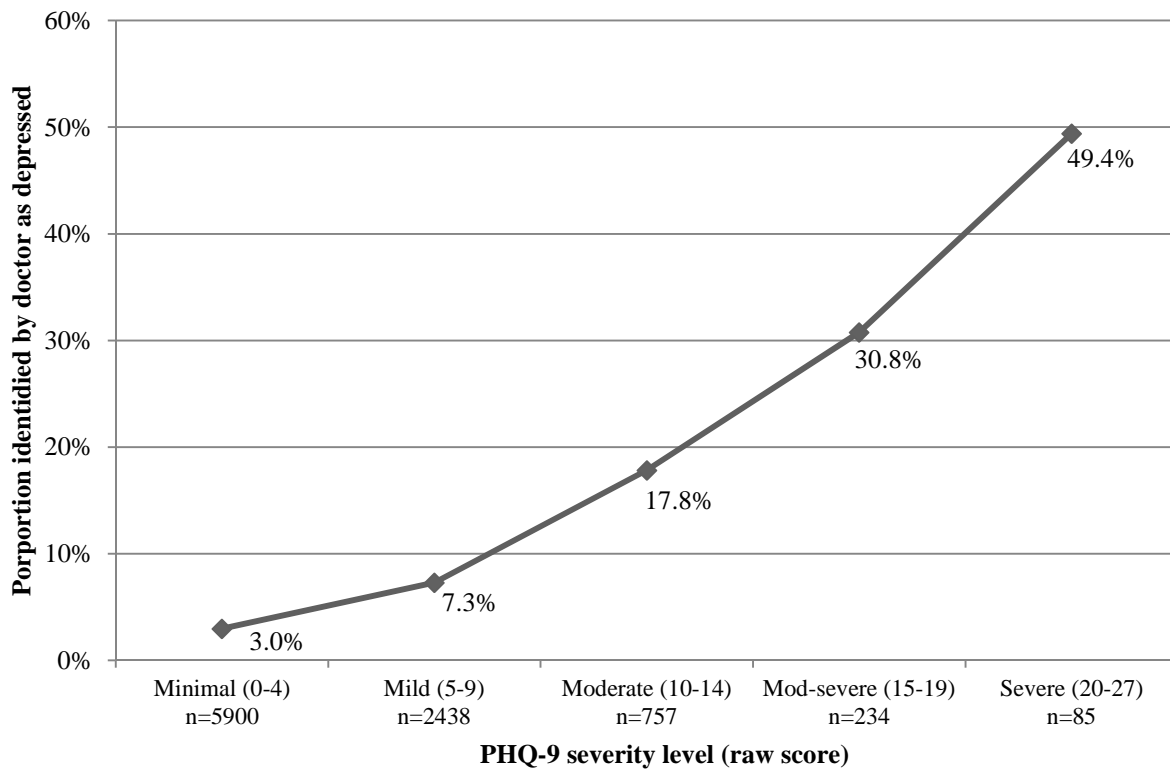

Supplement: MOESM6 [file 9435934]
